# Supplementary material for: Deep Immune Profiling of MIS-C demonstrates marked but transient immune activation compared to adult and pediatric COVID-19
Source: bioRxiv or medRxiv preprint supplement (doi:10.1101/2020.09.25.20201863), 2020-10-06

## **Supplementary Material**

for

### **Deep Immune Profiling of MIS-C demonstrates marked but transient immune activation compared to adult and pediatric COVID-19**

Vella, Giles, Baxter, Oldridge *et al*

#### Supplementary Figure Legends

Supplemental Table 1

Supplemental Table 2

Supplemental Table 3

Supplemental Figure 1

Supplemental Figure 2

Supplemental Figure 3

Supplemental Figure 4

Supplemental Figure 5

Supplemental Figure 6

Supplemental Figure 7

## SUPPLEMENTAL FIGURE LEGENDS

### **Supplemental Figure 1 - Innate immune compartment in MIS-C is broadly comparable to Pediatric COVID-19**

(A) White blood cell (WBC) counts in pediatric cohorts at time of draw. (B) Clinically determined cell counts in pediatric cohorts at time of draw. (C) Gating strategy and representative flow cytometry plots for immune populations from whole blood stain. (D) Frequencies of eosinophils, neutrophils and immature granulocytes across all cohorts. (E) Monocyte and subset frequencies across all cohorts. (F) Dendritic cell (DC) and subset frequencies across all cohorts. (ABDEF) Each dot represents an individual patient or subject, with adult HD in grey circles, adult COVID-19 in shades of mauve indicated by disease severity score, Ped COVID-19 in blue circles, with ARDS patients in dark blue, and MIS-C in green triangles. (AB) Normal clinical laboratory reference ranges for healthy pediatric subjects are indicated in grey shading. (DFE) Significance determined by unpaired Wilcoxon test between Ped COVID-19 and MIS-C groups only, indicated by: \*  $p < 0.05$ , or P value shown.

### **Supplemental Figure 2 - T cell proliferation in MIS-C is greater than in COVID-19**

(A) Gating scheme and representative flow cytometry plots for CD4 and CD8 T cell populations, from PBMC staining. (B) Frequencies of nonnaive(nn) CD4 T cell memory populations. (C) Frequencies of nnCD8 T cell memory populations. (D) Representative flow cytometry plots and quantification of Ki67+ nnCD4 T cells. (E) Representative flow cytometry plots and quantification of Ki67+ nnCD4 T cells. (F) Distribution of T cell memory subsets within HLA-DR+CD38+ nnCD4 (left) and CD8 T cells (right). (G) Distribution of T cell memory subsets within Ki67+ nnCD4 (left) and CD8 T cells (right). (B-G) Each dot represents an individual patient or subject, with adult HD in grey circles, adult COVID-19 in shades of mauve indicated by disease severity score, Ped COVID-19 in blue circles, with ARDS patients in dark blue, and MIS-C in green

triangles. **(BCDE)** Significance determined by unpaired Wilcoxon test between Ped COVID-19 and MIS-C groups only, indicated by: \*\*  $p < 0.01$ , or P value shown.

### **Supplemental Figure 3 - NK and CD8 MAIT cell activation in MIS-C is greater than in COVID-19**

**(A)** Representative flow cytometry plots and quantification of HLA-DR and CD38 single and double-expressing NK cells from the whole blood panel. **(B)** Representative flow cytometry plots and quantification of HLA-DR and CD38 single and double-expressing CD8 MAIT from the whole blood panel. **(AB)** Each dot represents an individual patient or subject, with adult HD in grey circles, adult COVID-19 in shades of mauve indicated by disease severity score, Ped COVID-19 in blue circles, with ARDS patients in dark blue, and MIS-C in green triangles. Significance determined by unpaired Wilcoxon test between Ped COVID-19 and MIS-C groups only, indicated by: \*  $p < 0.05$ , or P value shown.

### **Supplemental Figure 4 - Vascular patrolling CX3CR1+ populations in MIS-C are uniquely proliferative in MIS-C**

**(A)** Quantification of Ki67+ population within CX3CR1- and CX3CR1+ nnCD4 T cells. **(B)** Quantification of Ki67+ population within CX3CR1- and CX3CR1+ nnCD8 T cells. **(C)** Representative gating of Ki67+ population within CX3CR1- and CX3CR1+ nnCD8 T cells. **(AB)** Each dot represents an individual patient or subject, with adult HD in grey circles, adult COVID-19 in shades of mauve indicated by disease severity score, Ped COVID-19 in blue circles, with ARDS patients in dark blue, and MIS-C in green triangles. Significance determined by unpaired Wilcoxon test between Ped COVID-19 and MIS-C groups and determined by paired Wilcoxon test between CX3CR1- and CX3CR1+ within pediatric groups, indicated by: \*  $p < 0.05$ , \*\*  $p < 0.01$ , \*\*\*  $p < 0.001$  or P value shown.

**Supplemental Figure 5 - A transition towards B cell memory subsets from naive is associated with IFN $\gamma$  in both MIS-C and pediatric COVID-19**

(A) Representative gating for naive B cells and memory subsets. (B) Frequencies of naive B cells. (C) Frequencies of memory B cell subsets from the nonnaive(nn)B cell population. (D) Spearman correlation for indicated cytokines with frequencies of B cell subsets. Top panel indicates correlations in the combined pediatric cohort, lower two panels represent correlations within the Ped COVID-19 and MIS-C respectively. Spearman's Rank Correlation coefficient ( $\rho$ ) is indicated by square size and heat scale; significance indicated by: \*  $p < 0.05$ , \*\*  $p < 0.01$ , \*\*\*  $p < 0.001$ . (E) Spearman correlation for indicated cytokines with frequencies with HLA-DR+CD38+ and Ki67+ populations of nnCD4 and nnCD8 T cells, statistics and panels as in D. (F) Representative histogram of Eomes expression by PB for an adult HD (grey), Ped COVID-19 (blue) and MIS-C (green) and quantification of frequencies of Eomes+ PB. Significance determined by unpaired Wilcoxon test between pediatric cohorts indicated by: \*\*\*\*  $p < 0.001$ .

**Supplemental Figure 6 - Total and activated cTfh frequencies are not associated with PB responses in either pediatric cohort.**

(A) Representative flow cytometry plot and quantification for cTfh. (B) Representative flow cytometry plot and quantification for activated cTfh. (CDE) Frequencies of PB versus cTfh from nnCD4 T cells (C), activated cTfh from nnCD4 T cells (D), activated cTfh from total cTfh (E). Non-parametric trend lines (Sen-Theil) with Spearman's Rank Correlation coefficient ( $\rho$ ) and associated P value shown. (F) Representative flow cytometry plot and quantification for both frequency of CXCR5+ nnCD4 T cells and CXCR5 GMFI on nnCD4 T cells. Significance determined by unpaired Wilcoxon test comparing adult HD to both pediatric cohorts and indicated by: \*  $p < 0.05$ , \*\*  $p < 0.01$ , \*\*\*  $p < 0.001$  or P value shown. (A-F) Each dot represents an individual patient or subject, with adult HD in grey circles, adult COVID in shades of mauve indicated by disease severity score, Ped COVID-19 in blue circles, with ARDS patients in dark

blue, and MIS-C in green triangles. **(AB)** Significance determined by unpaired Wilcoxon test between pediatric cohorts.

**Supplemental Figure 7 - Features of CD4 T cell activation start to normalize over time, coincident with treatment and recovery from disease.**

**(A)** Selected CD4 T cell features over days since admission in Ped COVID-19 (left) and MIS-C subjects (right). Black lines connect repeat draws for individual subjects. For MIS-C, paired t-test P value is shown for the three subjects with repeat draws. Grey shading indicates the derived central 95% adult HD reference interval. **(B)** Flow cytometry plots for HLA-DR+CD38+ nnCD4 for MIS-C patients with repeat draws. **(C)** Flow cytometry plots for Ki67+ nnCD4 for MIS-C patients, as in **(B)**. **(A)** Each dot represents an individual patient with Pediatric COVID-19 in blue circles (ARDS patients in dark blue) and MIS-C in green triangles.

| Demographics                                                  | Pediatric COVID-19          |     | MIS-C                       |     |
|---------------------------------------------------------------|-----------------------------|-----|-----------------------------|-----|
|                                                               | Value (% or Range)*         | N** | Value (% or Range)*         | N** |
| Age (Years)                                                   | 14 [0.15-18]                | 16  | 9 [5.00-17]                 | 14  |
| Sex (F/M)                                                     | 8 (50%) / 8 (50%)           | 16  | 7 (50%) / 7 (50%)           | 14  |
| BMI (Age-Matched Percentile)                                  | 65 [1-99]                   | 16  | 92 [5-99]                   | 14  |
| Race (African-American/Caucasian)                             | 8 (53%) / 7 (47%)           | 15  | 4 (31%) / 9 (69%)           | 13  |
| <b>Medical History</b>                                        |                             |     |                             |     |
| Obesity                                                       | 2 (12%)                     | 16  | 5 (36%)                     | 14  |
| Diabetes Mellitus                                             | 1 (6%)                      | 16  | 0 (0%)                      | 14  |
| Symptomatic                                                   | 13 (81%)                    | 16  | 14 (100%)                   | 14  |
| Coinfection                                                   | 5 (31%)                     | 16  | 1 (7%)                      | 14  |
| Disease Type (COVID-19 non-ARDS / COVID-19 with ARDS / MIS-C) | 12 (75%) / 4 (25%) / 0 (0%) | 16  | 0 (0%) / 0 (0%) / 14 (100%) | 14  |
| <b>Treatment</b>                                              |                             |     |                             |     |
| Hydroxychloroquine                                            | 1 (6%)                      | 16  | 0 (0%)                      | 14  |
| Remdesivir                                                    | 4 (29%)                     | 14  | 1 (11%)                     | 9   |
| Convalescent Plasma                                           | 2 (12%)                     | 16  | 0 (0%)                      | 14  |
| Tocilizumab                                                   | 3 (19%)                     | 16  | 0 (0%)                      | 14  |
| Vasoactive Medication                                         | 8 (50%)                     | 16  | 9 (64%)                     | 14  |
| Intravenous Immunoglobulin                                    | 1 (6%)                      | 16  | 14 (100%)                   | 14  |
| Intravenous Immunoglobulin Before First Draw Date             | 0 (0%)                      | 1   | 11 (79%)                    | 14  |
| Steroids                                                      | 6 (38%)                     | 16  | 13 (93%)                    | 14  |
| Steroids Before First Draw Date                               | 6 (100%)                    | 6   | 10 (77%)                    | 13  |
| <b>Laboratory Results</b>                                     |                             |     |                             |     |
| Hemoglobin, 1st Research Draw                                 | 10.3 [7.4-14.8]             | 15  | 9.3 [7.6-11.8]              | 14  |
| Platelet Count, 1st Research Draw                             | 170 [13-581]                | 15  | 152 [70-537]                | 14  |
| Platelet Count, Nadir                                         | 140 [37-578]                | 16  | 134 [33-194]                | 14  |
| White Blood Cell Count, 1st Research Draw                     | 10.0 [1.1-24.2]             | 15  | 11.0 [2.2-29.8]             | 14  |
| Polymorphonuclear Cell Count, Absolute, 1st Research Draw     | 7.8 [0.2-21.3]              | 15  | 10.3 [2.0-25.8]             | 14  |
| Lymphocyte Count, Absolute, 1st Research Draw                 | 1.8 [0.4-5.3]               | 15  | 0.9 [0.1-5.7]               | 14  |
| Monocyte Count, Absolute, 1st Research Draw                   | 0.5 [0.0-1.9]               | 15  | 0.2 [0.0-1.4]               | 14  |
| Eosinophil Count, Absolute, 1st Research Draw                 | 0.0 [0.0-0.3]               | 15  | 0.0 [0.0-0.4]               | 14  |
| Basophil Count, Absolute, 1st Research Draw                   | 0.0 [0.0-0.1]               | 15  | 0.0 [0.0-0.1]               | 14  |
| Lymphocyte Count, Absolute, Nadir                             | 0.9 [0.1-2.8]               | 16  | 0.4 [0.1-1.5]               | 14  |
| Sodium, Nadir                                                 | 137 [130-144]               | 15  | 131 [126-140]               | 14  |
| D-Dimer, Peak                                                 | 1.9 [0.2-37.4]              | 10  | 4.9 [1.2-48.0]              | 13  |
| Ferritin, Peak                                                | 217 [60-16973]              | 7   | 892 [253-3868]              | 13  |
| Lactate Dehydrogenase, Peak                                   | 2874 [564-15390]            | 5   | 864 [457-2761]              | 12  |
| Troponin, Peak                                                | 0.1 [0.0-1.8]               | 4   | 0.6 [0.0-7.4]               | 13  |
| Procalcitonin, Peak                                           | 17.62 [0.07-200.00]         | 8   | 10.04 [0.24-200.00]         | 11  |
| Non-Cardiac C-Reactive Protein, Peak                          | 21.4 [0.7-60.1]             | 13  | 26.2 [6.8-40.0]             | 14  |

\*Values are expressed as counts (with percent of total) for discrete data or as medians [with range] for continuous data.

\*\*N is the number of patients with non-missing annotation for each variable.

### Supplementary Table S1: Patient Characteristics

| VENDOR                  | CAT#         | ANTIBODY/DYE and TARGET                   | CLONE    | DILUTION |
|-------------------------|--------------|-------------------------------------------|----------|----------|
| BD OptiBuild            | 740298       | BUV395 mouse anti-human CD45RA            | HI100    | 800      |
| BD Horizon              | 612943       | BUV496 mouse anti-human CD8               | RPA-T8   | 400      |
| BD Horizon              | 612916       | BUV563 mouse anti-human CD19              | SJ25C1   | 200      |
| BD OptiBuild            | 751572       | BUV615 mouse anti-human CD16              | 3G8      | 200      |
| BD Horizon              | 612969       | BUV661 mouse anti-human CD38              | HIT2     | 400      |
| BD Horizon              | 612829       | BUV737 mouse anti-human CD27              | L128     | 100      |
| BD Horizon              | 612905       | BUV805 mouse anti-human CD20              | 2H7      | 800      |
| Biologend               | 329920       | BV421 mouse anti-human CD279 (PD-1)       | EH12.2H7 | 100      |
| BD Horizon              | 566138       | BV480 mouse anti-human IgD                | IA6-2    | 50       |
| Tombo                   | 13-0870-T500 | Ghost Dye™ Violet 510                     | NA       | 400      |
| Biologend               | 300436       | BV570 mouse anti-human CD3                | UCHT1    | 25       |
| Biologend               | 356520       | BV605 mouse anti-human CD138 (Syndecan-1) | MI15     | 25       |
| Biologend               | 305642       | BV650 mouse anti-human CD95 (Fas)         | DX2      | 100      |
| BD Horizon              | 563163       | BV711 mouse anti-human CD21               | B-ly4    | 800      |
| BD Horizon              | 566355       | BV750 mouse anti-human CD4                | SK3      | 20000    |
| BD Horizon              | 564041       | BV786 mouse anti-human HLA-DR             | G46-6    | 100      |
| BD Horizon              | 564624       | BB515 rat anti-human CD185 (CXCR5)        | RF8B2    | 50       |
| BD Horizon              | 566437       | BB700 rat anti-human CD197 (CCR7)         | 3D12     | 50       |
| BD Biosciences          | CUSTOM       | BB790 Streptavidin                        | NA       | 400      |
| Biologend               | 341617       | Biotin rat anti-human CX3CR1              | 2A9-1    | 100      |
| Miltenyi                | 130-120-716  | PE recombinant anti-human TOX             | REA473   | 50       |
| Invitrogen              | 61-4877-42   | PE-eFluor610 mouse anti-human EOMES       | WD1928   | 100      |
| Invitrogen              | GRB18        | PE-Cy5.5 mouse anti-human Granzyme B      | GB11     | 2000     |
| Biologend               | 644824       | PE-Cy7 mouse anti-human T-bet             | 4B10     | 800      |
| ThermoFisher            | 15-9949-82   | PE-Cy5 hamster anti-human CD278 (ICOS)    | C398.4A  | 50       |
| CellSignalingTechnology | 6709S        | AF647 rabbit anti-human TCF1/TCF7         | C63D9    | 100      |
| BD Horizon              | 561277       | AF700 mouse anti-human Ki-67              | B56      | 200      |
| Biologend               | 328230       | APC/Fire750 anti-human CD39               | A1       | 50       |

**Supplementary Table 2: Panel for Peripheral Blood Mononuclear Cell Flow Cytometric Staining**

| <b>VENDOR</b>  | <b>CAT#</b> | <b>ANTIBODY/DYE and TARGET</b>              | <b>CLONE</b> | <b>DILUTION</b> |
|----------------|-------------|---------------------------------------------|--------------|-----------------|
| BD Horizon     | 564071      | BUV395 mouse anti-human Ki67                | B56          | 200             |
| BD Horizon     | 564804      | BUV496 mouse anti-human CD8                 | RPA-T8       | 500             |
| BD Horizon     | 565702      | BUV563 mouse anti-human CD45RA              | HI100        | 500             |
| BD Horizon     | 565069      | BUV661 mouse anti-human CD38                | HIT2         | 400             |
| BD Horizon     | 564385      | BUV737 mouse anti-human CD25                | 2A3          | 200             |
| BD Horizon     | 565515      | BUV805 mouse anti-human CD3                 | UCHT1        | 125             |
| Biologend      | 329920      | BV421 mouse anti-human CD279 (PD-1)         | EH12.2H7     | 83.3            |
| BD Horizon     | 566141      | BV480 mouse anti-human CD14                 | MP9          | 500             |
| Invitrogen     | L34957      | LIVE/DEAD™ Fixable Aqua Dead Cell Stain Kit | NA           | 15000           |
| Biologend      | 318330      | BV570 mouse anti-human CD56                 | HCD56        | 200             |
| BD Horizon     | 562845      | BV605 mouse anti-human HLA-DR               | G46-6        | 250             |
| Biologend      | 302828      | BV650 mouse anti-human CD27                 | O323         | 200             |
| Biologend      | 302044      | BV711 mouse anti-human CD16                 | 3G8          | 666.7           |
| BD OptiBuild   | 747111      | BV750 rat anti-human CD185 (CXCR5)          | RF8B2        | 500             |
| Biologend      | 302240      | BV785 mouse anti-human CD19                 | HIB19        | 125             |
| BD Horizon     | 555401      | FITC mouse anti-human CD15                  | HI98         | 50              |
| BD OptiBuild   | 746472      | BB700 mouse anti-human CD103                | Ber-ACT8     | 500             |
| BD Biosciences | CUSTOM      | BB790 mouse anti-human CD4                  | SK3          | 1250            |
| BD OptiBuild   | 746472      | PE mouse anti-human CD123                   | 9F5          | 400             |
| BD Horizon     | 562397      | PE-CF594 mouse anti-human CD127             | HIL-7R-M21   | 200             |
| Biologend      | 310908      | PE-Cy5 mouse anti-human CD69                | FN50         | 500             |
| eBioscience    | 35-0114-82  | PE-Cy5.5 mouse anti-human CD11c             | N418         | 100             |
| Biologend      | 354912      | PE-Cy7 mouse anti-human CD21                | BU32         | 2000            |
| BD Horizon     | 550968      | APC mouse anti-human CD161                  | DX12         | 10              |
| BD Horizon     | 560566      | AF700 mouse anti-human CD45                 | HI30         | 83.3            |
| Biologend      | 353212      | APC-Cy7 mouse anti-human CD197 (CCR7)       | G043H7       | 66.7            |

**Supplementary Table 3: Lineage Panel for Whole Blood Flow Cytometric Staining**



# Supplemental Figure 1

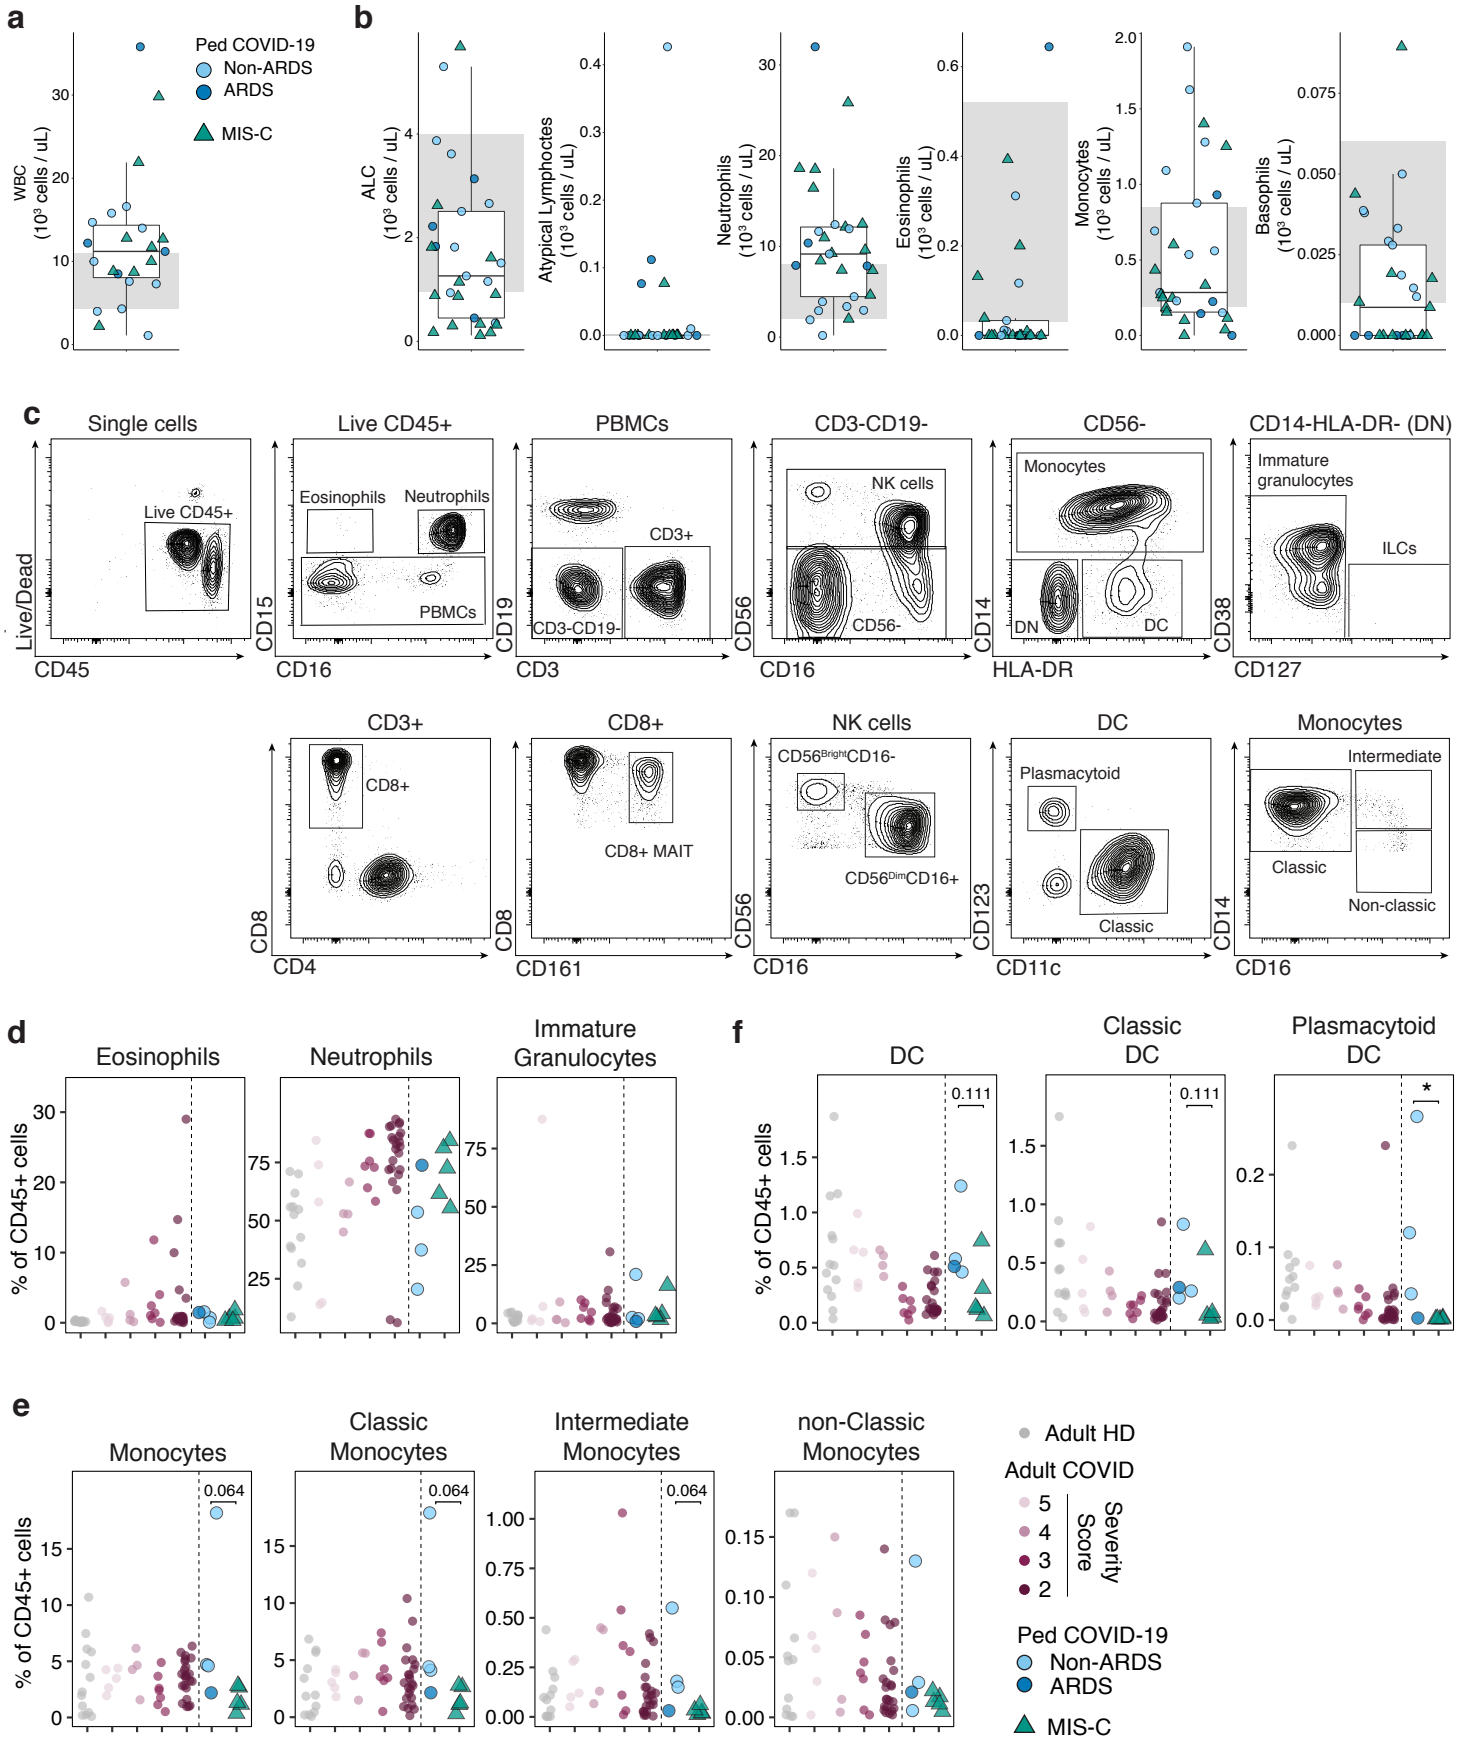

# Supplemental Figure 2

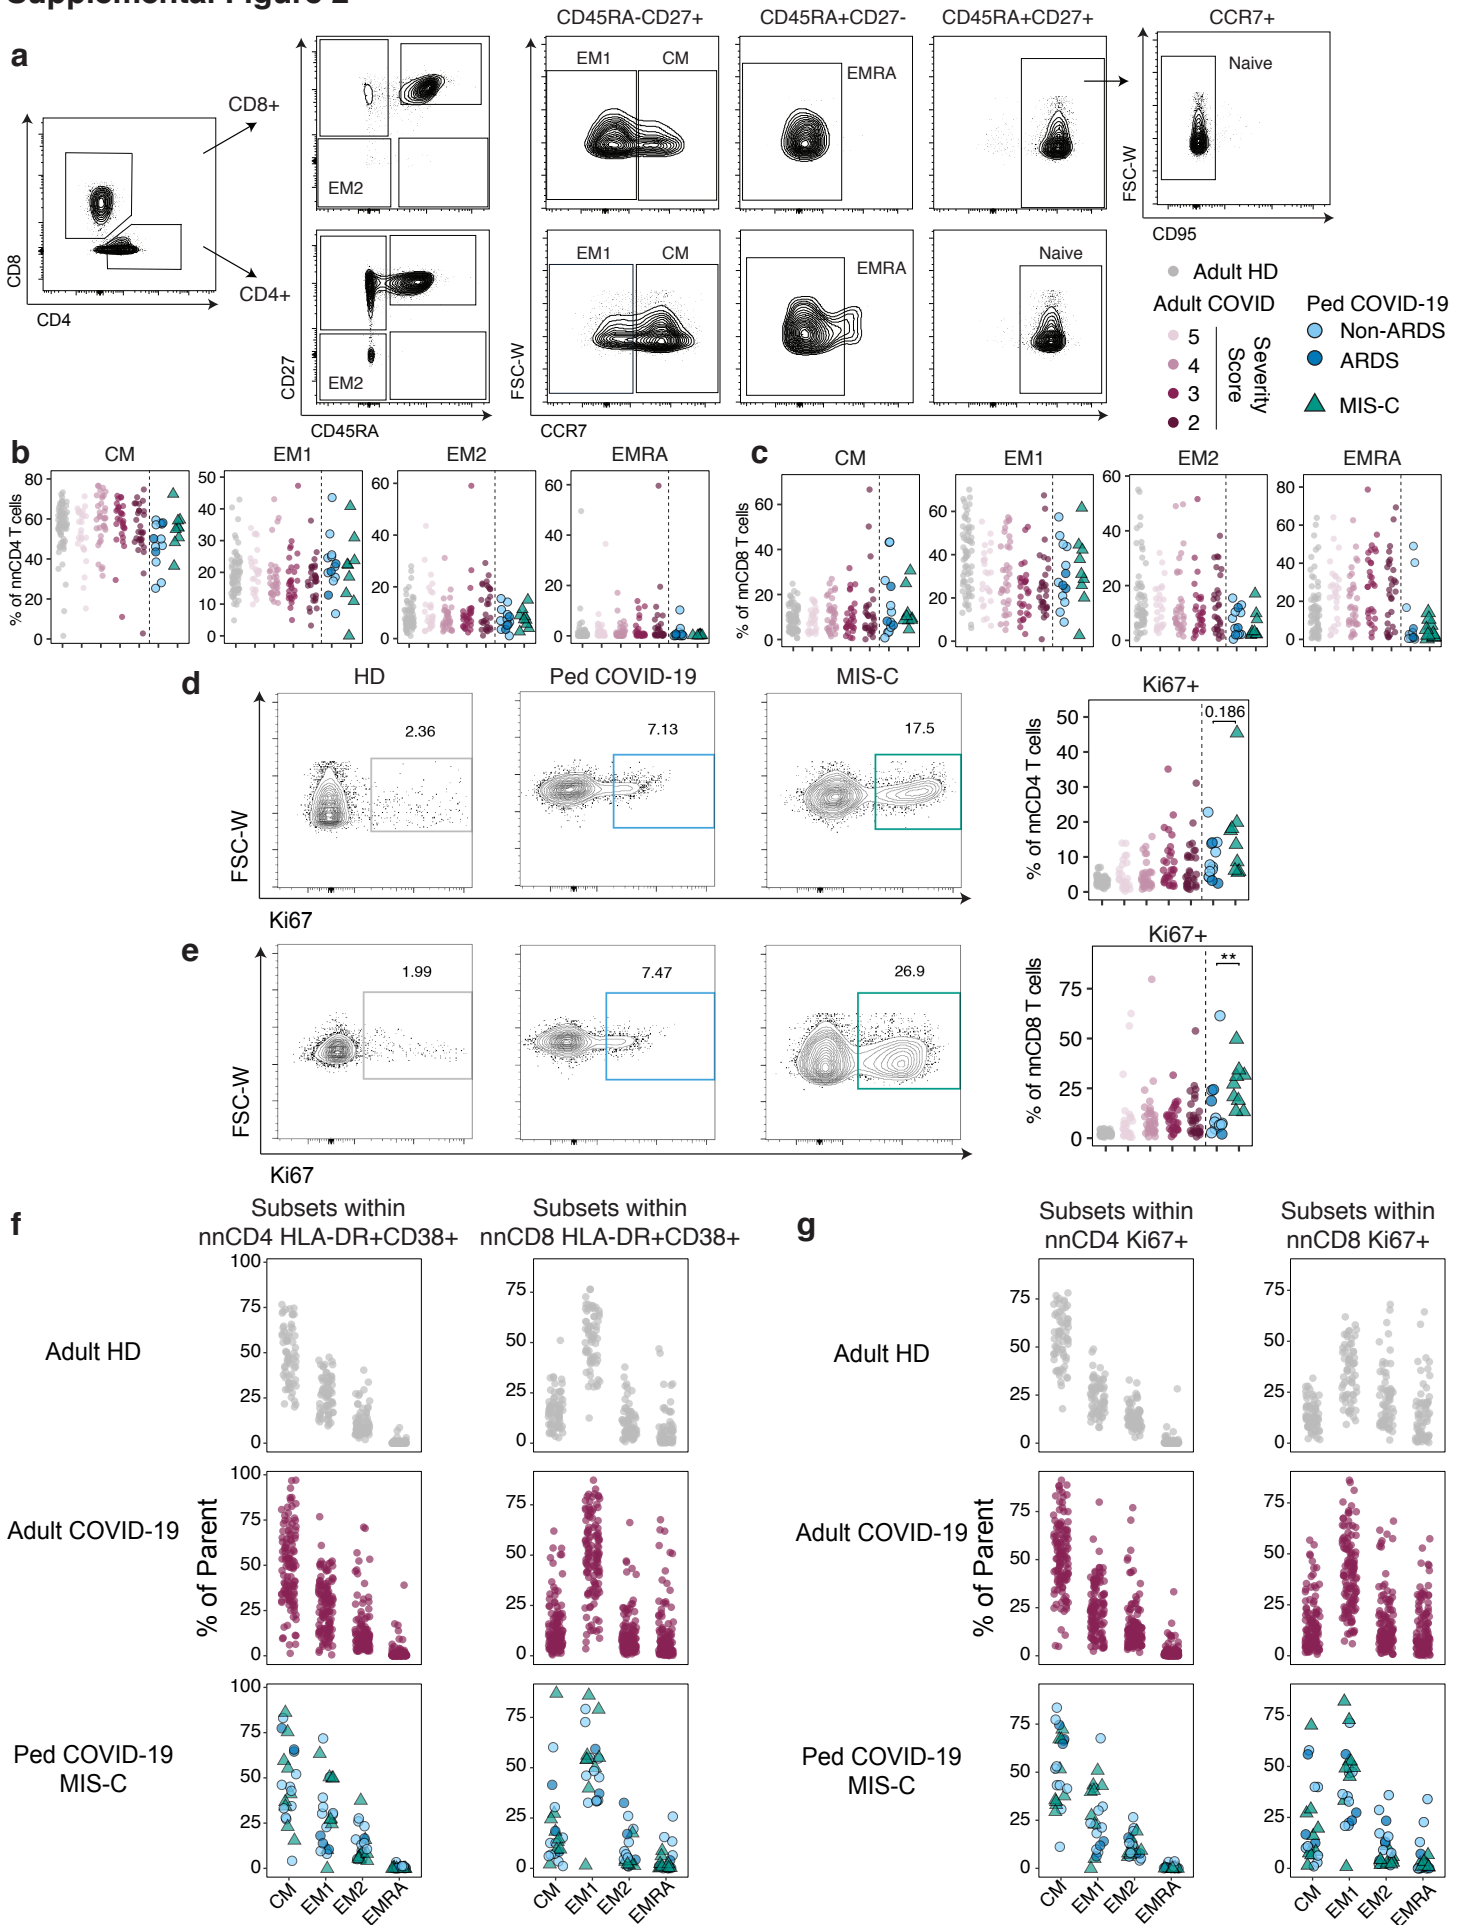

### Supplemental Figure 3

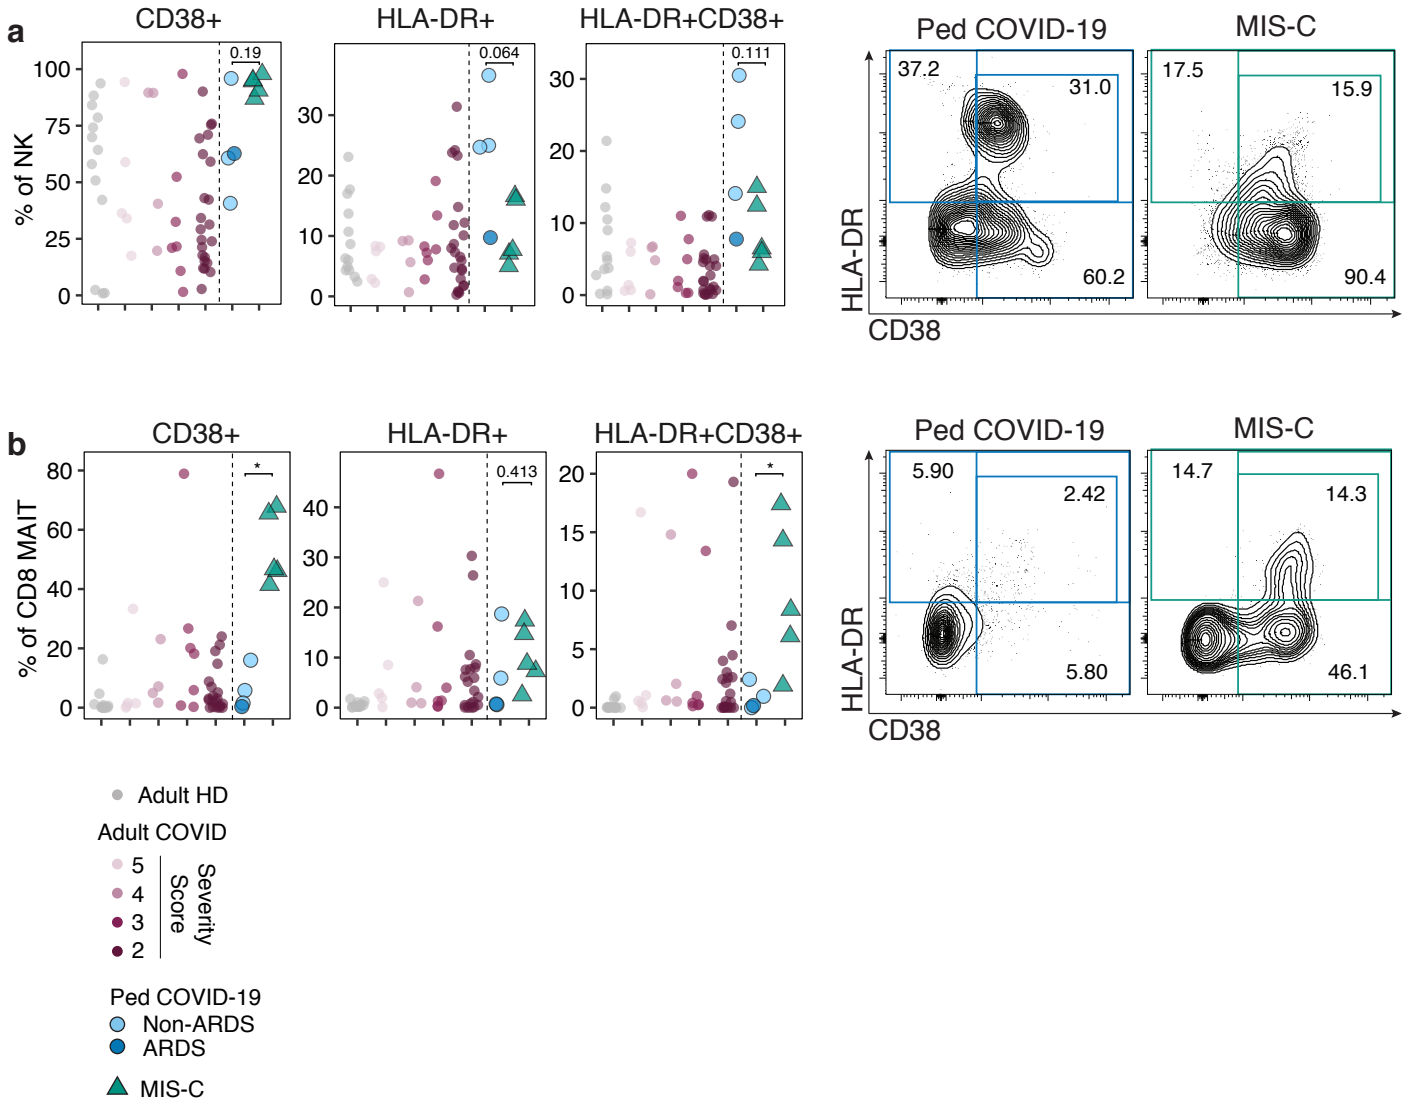

Supplemental Figure 4

a

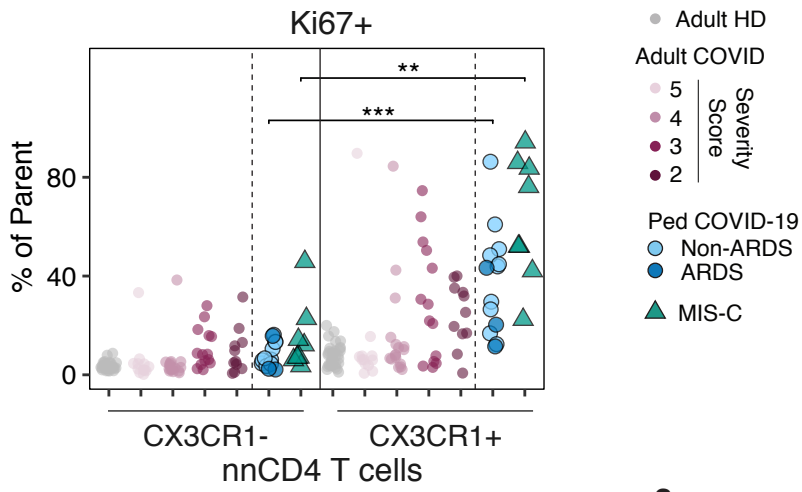

b

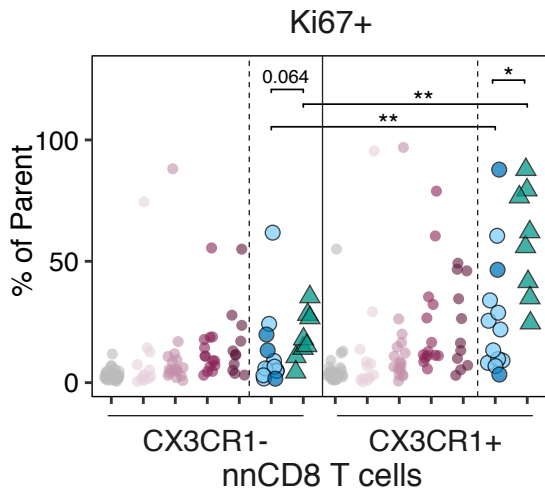

c

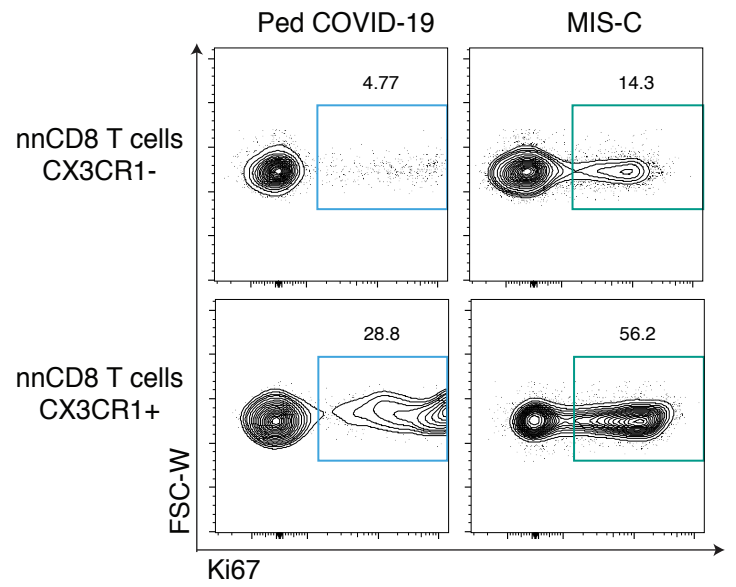

# Supplemental Figure 5

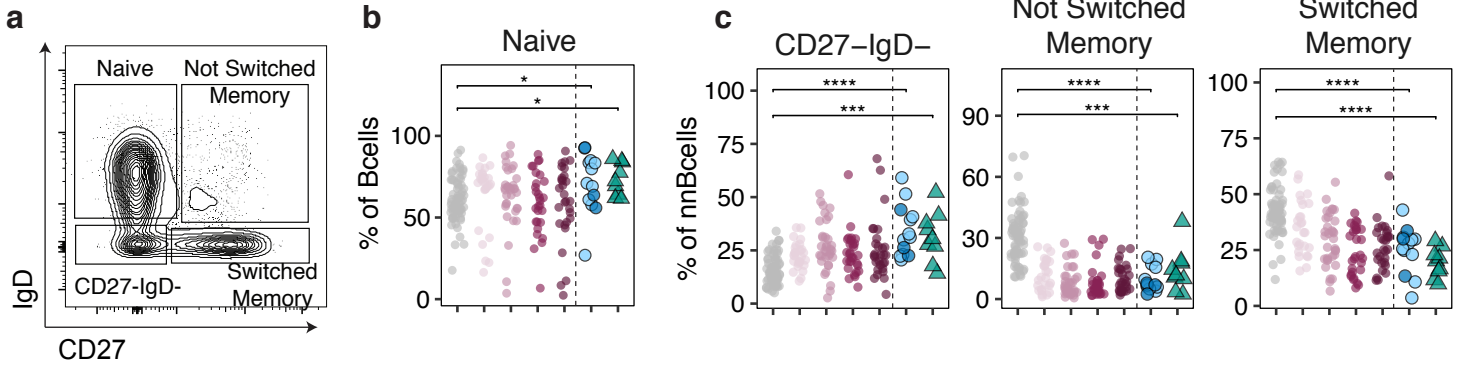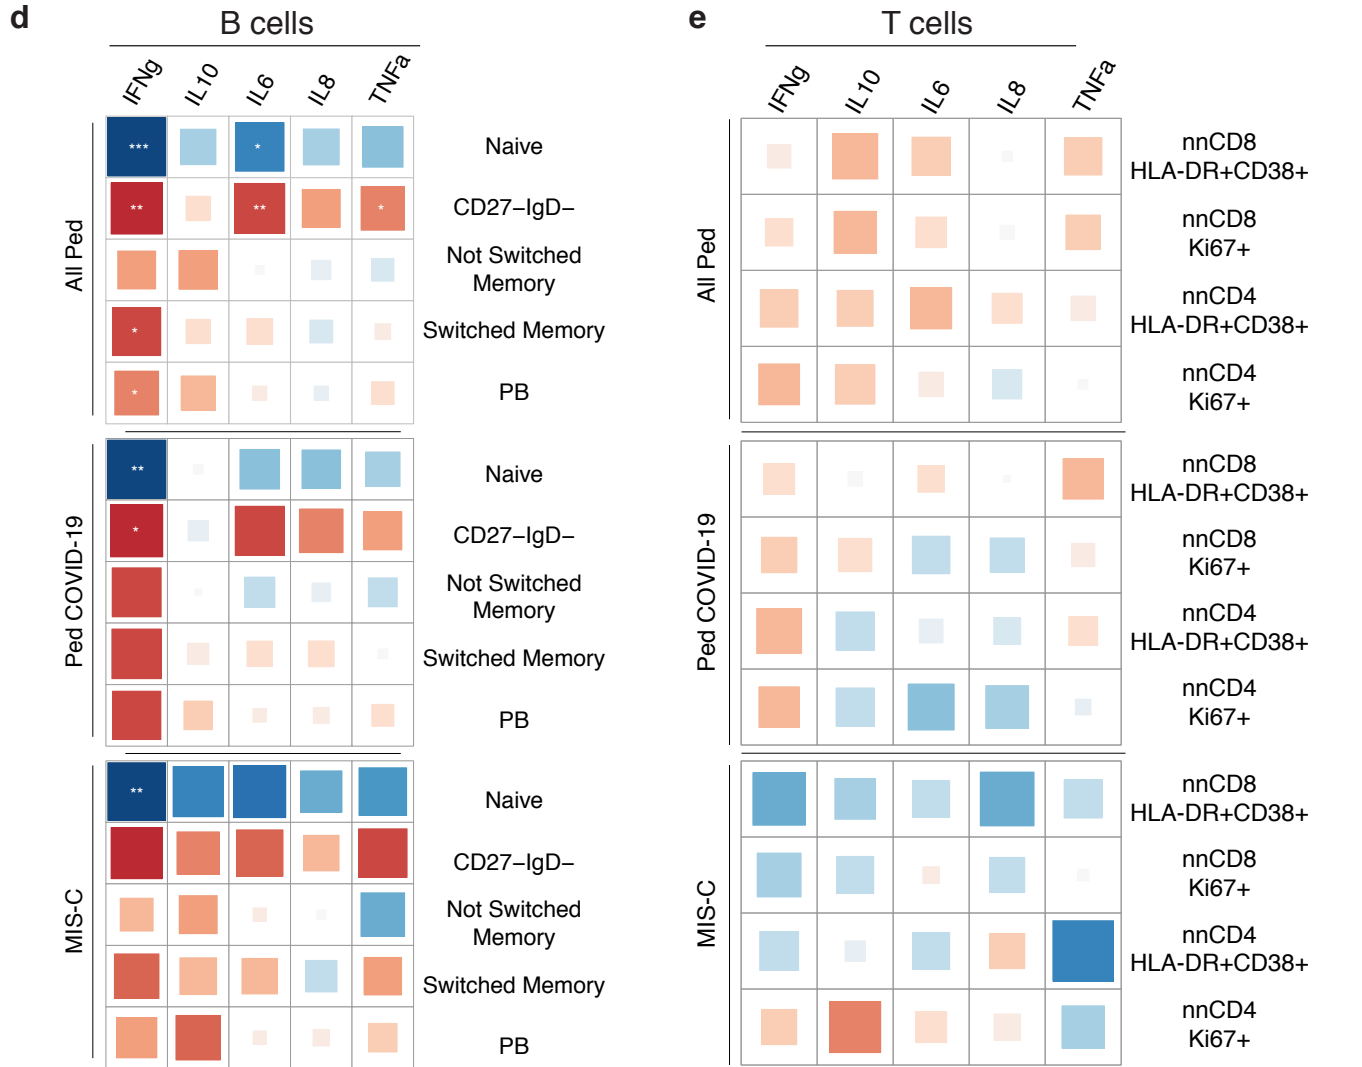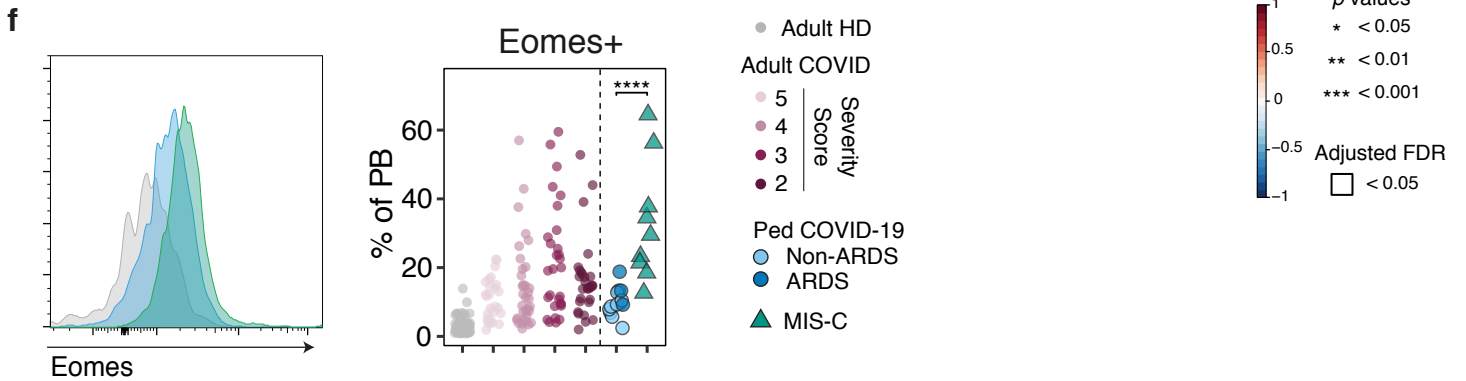

# Supplemental Figure 6

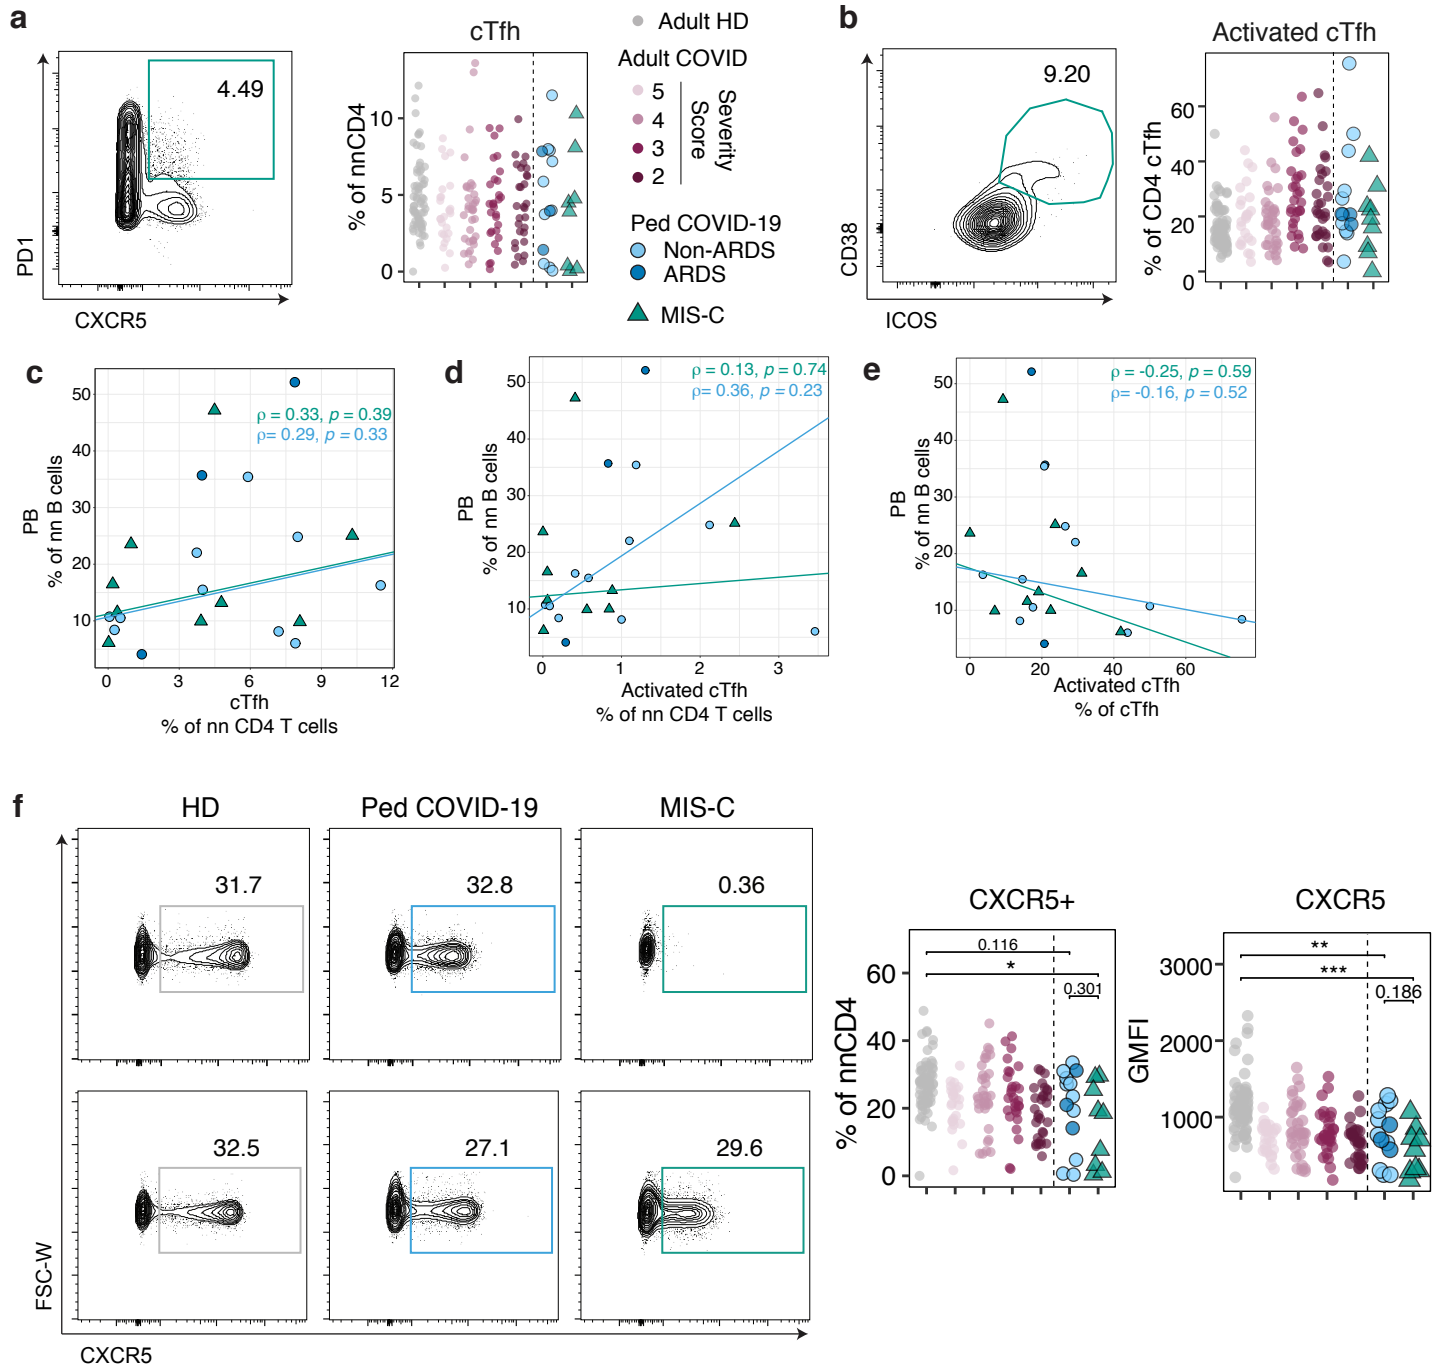

# Supplemental Figure 7

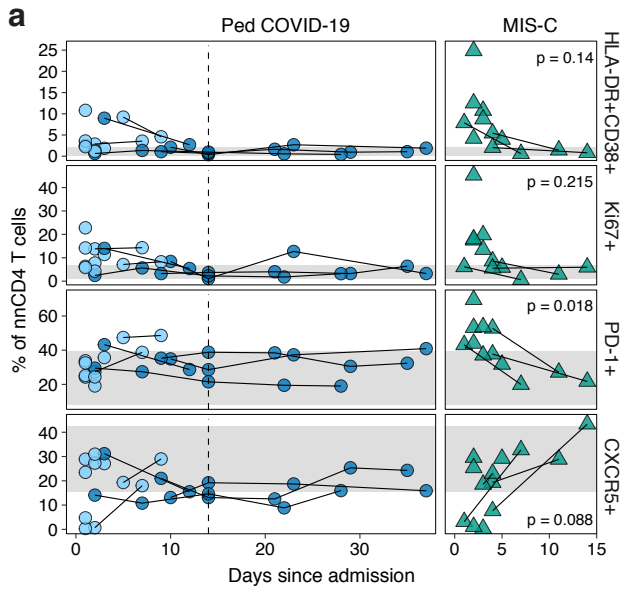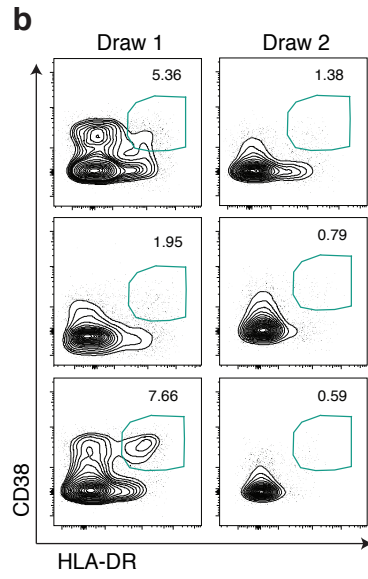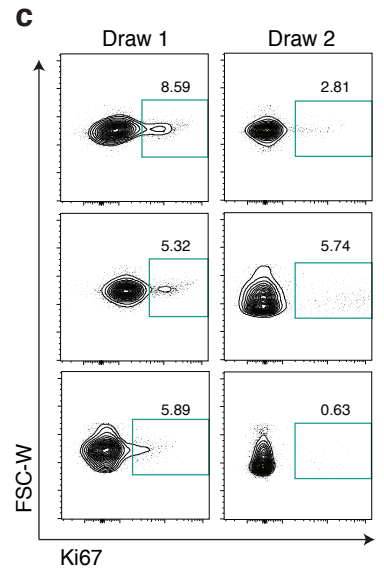

Supplement: Supplementary file [file 2020.09.25.20201863-1.pdf]
